# Supplementary material
Source: MDPI journal article supplement (https://www.mdpi.com/2571-8797/3/4/42)
Supplement: s1 [file s1]

**Table S1 Life cycle inventory of microalgal cultivation via photoautotrophic and heterotrophic modes of nutrition**

| <b>Unit Operation</b>                  | <b>Value</b> | <b>Units</b>             |
|----------------------------------------|--------------|--------------------------|
| <b>Cultivation</b>                     |              |                          |
| <b>Airlift Photobioreactor</b>         |              |                          |
| Electrical Energy                      | 2.47         | MJ/ kg biomass           |
| Biomass concentration                  | 1.74         | kg/ m <sup>3</sup>       |
| Lipid content                          | 20           | %                        |
| EPA+DHA Content                        | 15           | % of Lipids              |
| Sodium Nitrate                         | 0.241        | kg/ kg biomass           |
| Magnesium Sulphate                     | 0.043        | kg/ kg biomass           |
| Sodium Chloride                        | 17.23        | kg/ kg biomass           |
| Calcium Chloride                       | 0.02         | kg/ kg biomass           |
| <b>Fermenter</b>                       |              |                          |
| Electrical Energy                      | 3.88         | MJ/ kg of biomass        |
| Biomass concentration                  | 30           | Kg/m <sup>3</sup>        |
| EPA+DHA content                        | 0.06         | kg/ kg of biomass        |
| Glucose                                | 2            | kg/ kg of biomass        |
| Sodium Chloride                        | 0.32         | kg/ kg of biomass        |
| Yeast Extract                          | 0.32         | kg/ kg of biomass        |
| <b>Harvesting</b>                      |              |                          |
| <b>Flocculation (A)</b>                |              |                          |
| Magnesium Hydroxide                    | 0.09         | kg/ kg of biomass        |
| Electrical Energy                      | 0.0007       | MJ/ kg of biomass        |
| <b>Centrifugation (H)</b>              |              |                          |
| Electrical Energy                      | 0.815        | MJ/ kg of biomass        |
| <b>Spray drying</b>                    |              |                          |
| Steam (H)                              | 5.53         | MJ/ kg of biomass        |
| Steam (A)                              | 4.26         | MJ/ kg of biomass        |
| <b>Lipid extraction &amp; refining</b> |              |                          |
| Algal meal (H)                         | 0.74         | kg/ kg of biomass        |
| Lipids (H)                             | 0.26         | kg/ kg of biomass        |
| Algal meal (A)                         | 0.8          | kg/ kg of biomass        |
| Lipids (A)                             | 0.2          | kg/ kg of biomass        |
| Phosphoric Acid (A)                    | 0.03         | kg/ kg of degummed oil   |
| Sodium Hydroxide (A)                   | 0.01         | g/ kg of neutralised oil |
| Fullers earth (A)                      | 0.789        | g/ kg of bleached oil    |
| Activated carbon (A)                   | 0.233        | g/ kg of bleached oil    |
| Phosphoric acid (H)                    | 0.01         | kg/ kg of degummed oil   |
| Sodium Hydroxide (H)                   | 0.005        | g/ kg of neutralised oil |
| Fullers Earth (H)                      | 0.395        | g/ kg of bleached oil    |
| Activated Carbon (H)                   | 0.116        | g/ kg of bleached oil    |

\*A- Photoautotrophy; H- Heterotrophy; EPA- Eicosapentanoic Acid; DHA-Docosahexanoic Acid

**Table S2 Life cycle inventory of fish farming and oil extraction from fish biomass**

| Unit Operation         | Value   | Units                          |
|------------------------|---------|--------------------------------|
| <b>Cultivation</b>     |         |                                |
| Diesel                 | 1.72    | MJ per kg of fish              |
| Gasoline               | 1.29    | MJ per kg of fish              |
| Natural gas            | 39.7    | MJ per kg of fish              |
| Electricity            | 1.06    | MJ per kg of fish              |
| Crude oil              | 0.00166 | MJ per kg of fish              |
| Feed                   | 1.3     | Kg per kg of fish              |
| EPA+DHA                | 22      | g per kg of fish               |
| <b>Cold Storage</b>    |         |                                |
| Electricity            | 0.0518  | MJ per kg of fish              |
| <b>Mincing</b>         |         |                                |
| Electricity            | 0.274   | MJ per kg of fish              |
| <b>Cooking</b>         |         |                                |
| Steam                  | 471     | MJ per kg of fish              |
| <b>Centrifugation</b>  |         |                                |
| Electricity            | 0.445   | MJ per kg of oil               |
| <b>Refining of oil</b> |         |                                |
| Electricity            | 0.03    | MJ per kg of degummed oil      |
| Phosphoric acid        | 0.01    | kg per kg of degummed oil      |
| Sodium Hydroxide       | 0.01    | g per kg of neutralised oil    |
| Fullers earth          | 0.79    | g per kg of bleached oil       |
| Activated carbon       | 0.23    | g per kg of bleached oil       |
| Acetic acid            | 0.09    | g per kg of omega-3 fatty acid |

**Table S3 Environmental impacts of EPA+DHA production from microalgal biomass via photoautotrophic and heterotrophic mode of nutrition and from Farmed Fish****Photoautotrophy**

|              | Cultivation | Extraction | Harvesting | Oil Refining | Spray Drying |
|--------------|-------------|------------|------------|--------------|--------------|
| ADP elements | 0.0185      | 6.14E-09   | 0.000104   | 3.44E-09     | 1.14E-06     |
| ADP fossil   | 1.47E+03    | 1.61       | 165        | 0.188        | 348          |
| AP           | 0.721       | 5.03E-05   | 0.0281     | 1.83E-05     | 0.0107       |
| EP           | 0.174       | 7.78E-06   | 0.00446    | 2.06E-06     | 0.00188      |
| FAETP        | 0.516       | 0.000209   | 0.024      | 8.49E-06     | 0.00592      |
| GWP          | 112         | 0.0777     | 14.2       | 0.0156       | 20.8         |
| HTP          | 4.42        | 0.00159    | 0.464      | 0.000441     | 0.308        |
| MAETP        | 4.79E+03    | 1.1        | 1.21E+03   | 0.981        | 133          |
| ODP          | 2.72E-11    | 4.32E-17   | 1.10E-09   | 6.50E-17     | 1.34E-15     |
| POCP         | 0.076       | 8.97E-06   | 0.00231    | 1.72E-06     | 0.00176      |
| TETP         | 0.224       | 0.000102   | 0.16       | 9.61E-06     | 0.0178       |

\*ADP- Abiotic Depletion Potential; AP- Acidification Potential; EP- Eutrophication Potential; FAETP- Freshwater Aquatic Ecotoxicity Potential; GWP- Global Warming Potential; HTP- Human Toxicity Potential; MAETP- Marine Aquatic Ecotoxicity Potential; ODP- Ozone Depletion Potential; POCP- Photochemical Ozone Creation Potential; TETP- Terrestrial Ecotoxicity Potential

## Heterotrophy

|              | Cultivation | Extraction | Harvesting | Oil Refining | Spray Drying |
|--------------|-------------|------------|------------|--------------|--------------|
| ADP elements | 0.0011      | 6.62E-09   | 5.61E-06   | 1.38E-05     | 9.39E-07     |
| ADP fossil   | 986         | 2.05       | 185        | 14.3         | 418          |
| AP           | 0.211       | 0.000266   | 0.035      | 0.00225      | 0.0838       |
| EP           | 0.0289      | 2.24E-05   | 0.00389    | 0.000432     | 0.00668      |
| FAETP        | 0.209       | 0.000759   | 0.037      | 0.00209      | 0.179        |
| GWP          | 87.9        | 0.124      | 16.8       | 1.26         | 33.9         |
| HTP          | 3.77        | 0.00861    | 0.732      | 0.0398       | 2.69         |
| MAETP        | 9.86E+03    | 3.14       | 2.00E+03   | 102          | 765          |
| ODP          | 4.06E-11    | 6.52E-17   | 5.02E-13   | 3.73E-14     | 4.85E-15     |
| POCP         | 0.0165      | 2.38E-05   | 0.0025     | 0.000183     | 0.00644      |
| TETP         | 0.102       | 0.000204   | 0.0183     | 0.00179      | 0.0472       |

## Fish Oil

|                            | Cold Storage | Cooking  | Farming  | Mincing  | Oil refining fish | Pressing and centrifugation |
|----------------------------|--------------|----------|----------|----------|-------------------|-----------------------------|
| ADP elements [kg Sb eq.]   | 8.23E-05     | 0.000583 | 0.00256  | 0.000435 | 4.50E-06          | 5.66E-05                    |
| ADP fossil [MJ]            | 2.72E+03     | 1.78E+05 | 2.26E+06 | 1.44E+04 | 136               | 1.87E+03                    |
| AP [kg SO2 eq.]            | 0.514        | 5.47     | 72.4     | 2.72     | 0.025             | 0.353                       |
| EP [kg Phosphate eq.]      | 0.057        | 0.961    | 5.05     | 0.302    | 0.00279           | 0.0392                      |
| FAETP [kg DCB eq.]         | 0.542        | 3.03     | 68       | 2.86     | 0.0266            | 0.373                       |
| GWP 100 years [kg CO2 eq.] | 247          | 1.06E+04 | 2.95E+04 | 1.30E+03 | 12.1              | 170                         |
| HTP [kg DCB eq.]           | 10.7         | 157      | 558      | 56.7     | 0.522             | 7.37                        |
| MAETP [kg DCB eq.]         | 2.93E+04     | 6.77E+04 | 1.86E+06 | 1.55E+05 | 1.42E+03          | 2.01E+04                    |
| ODP [kg R11 eq.]           | 7.35E-12     | 6.86E-13 | 1.52E-10 | 3.89E-11 | 3.56E-13          | 5.06E-12                    |
| POCP [kg Ethene eq.]       | 0.0366       | 0.898    | 8.48     | 0.194    | 0.00179           | 0.0252                      |
| TETP [kg DCB eq.]          | 0.268        | 9.09     | 26.3     | 1.42     | 0.0133            | 0.184                       |
